# Supplementary material for: Synthesis of inorganic aerogels via rapid gelation using chloride precursors
Source: Royal Society of Chemistry journal article supplement (doi:10.1039/c3ra41688g), 2013-01-01
Supplement: c3ra41688g.pdf [file c3ra41688g.pdf]

## Supplementary Information

# Synthesis of inorganic aerogels via rapid gelation using chloride precursors

Helmut Schäfer<sup>\*,†</sup>, Barbara Milow and Lorenz Ratke<sup>\*,‡</sup>

<sup>†</sup> University of Osnabrueck, Institute of Chemistry of New Materials, Physical Chemistry, Barbarastrasse 7, 49069 Osnabrueck, Germany

<sup>‡</sup> German Aerospace Center, Institute of Materials Physics in Space, Linder Höhe, 51147 Cologne, Germany

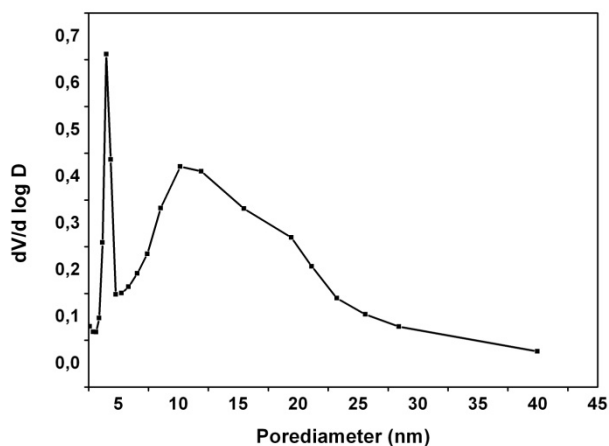

Fig. S1: BJH plot from silica aerogel sample HS\_8

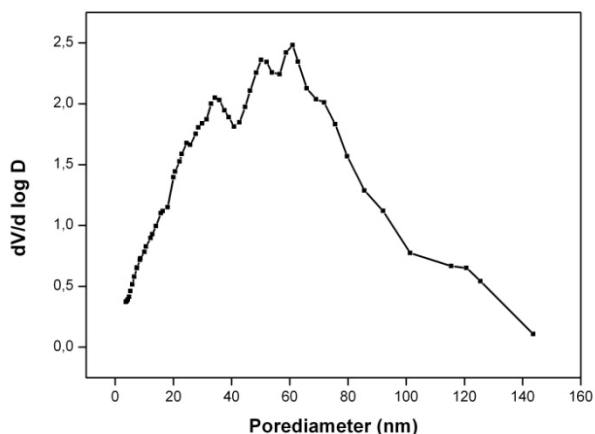

Fig. S2: BJH plot from silica aerogel sample HS\_97

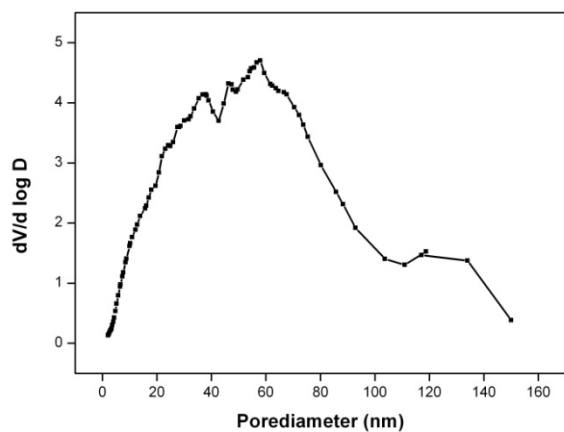

Fig. S3: BJH plot from silica aerogel sample HS\_128

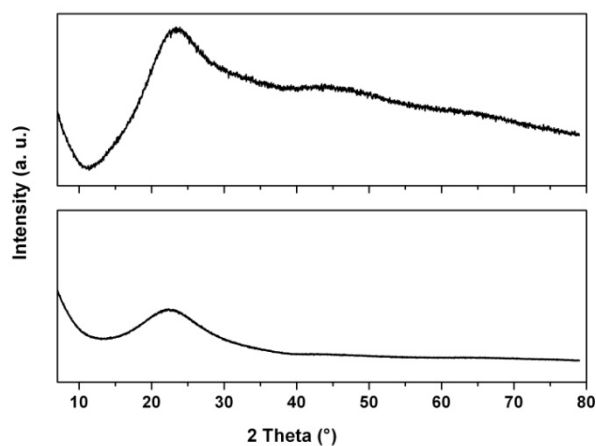

Fig. S4: Powder Diffraction pattern from silica aerogel HS\_16.2 as-prepared (upper figure), respectively heat-treated (lower figure)

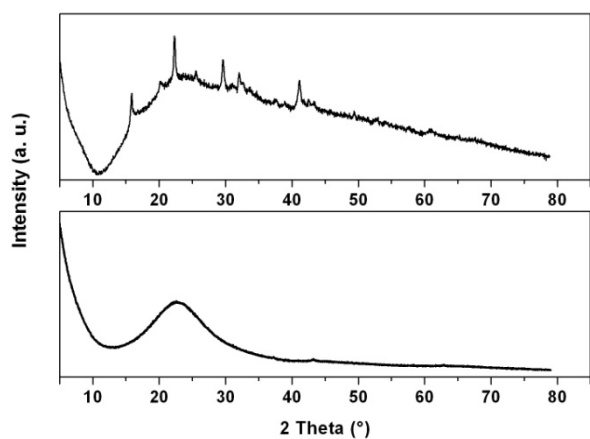

Fig. S5: Powder Diffraction pattern from silica aerogel HS\_36 as-prepared (upper figure), respectively heat-treated (lower figure).

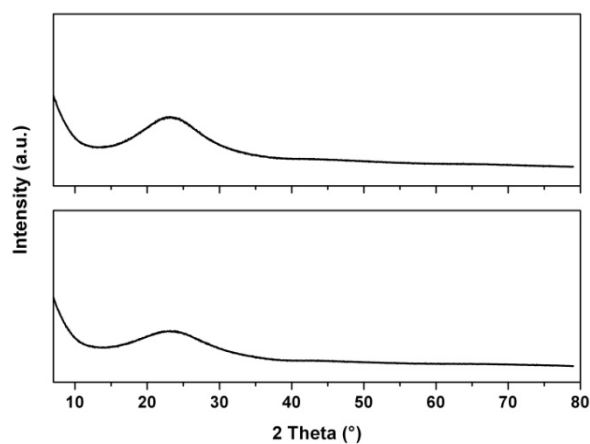

Fig. S6: Powder Diffraction pattern from silica aerogel HS\_8 as-prepared (upper figure), respectively heat-treated (lower figure).

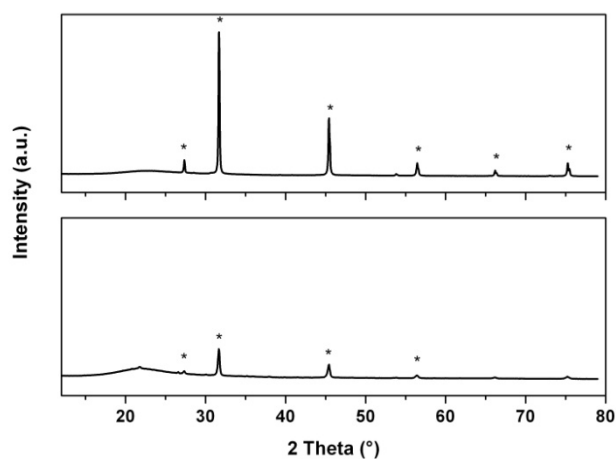

Fig. S7: Powder Diffraction pattern from silica aerogel HS\_97 as-prepared (upper figure), respectively heat-treated (lower figure). Peaks corresponding to NaCl (pdf card 01-077-2064) are marked with an asterisk.

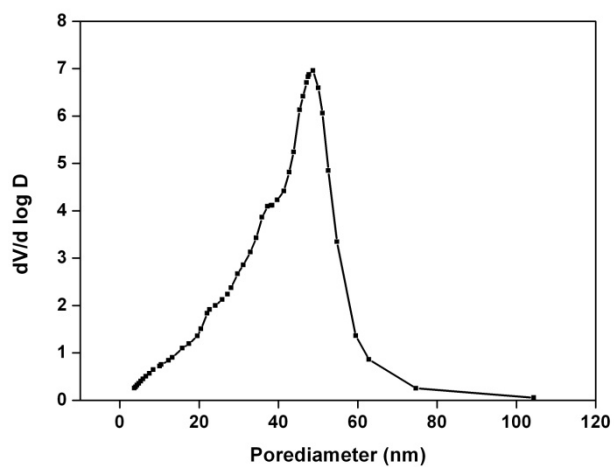

Fig. S8: BJH plot from silica/titania aerogel sample HS\_91

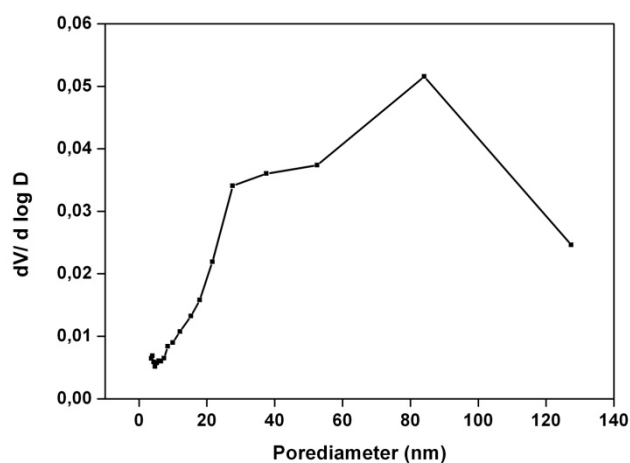

Fig. S9: BJH plot from silica-/titania aerogel sample HS\_43.1

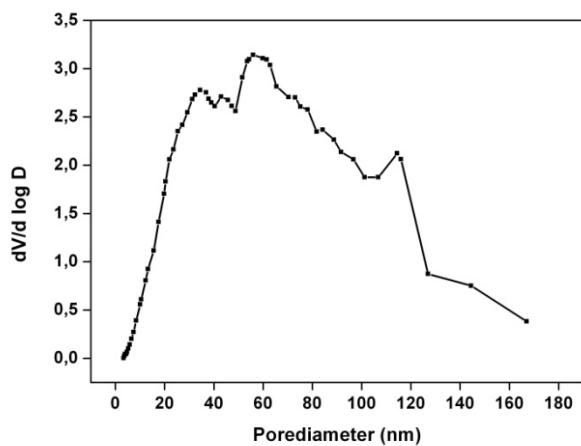

Fig. S10: BJH plot from silica-/titania aerogel sample HS\_126

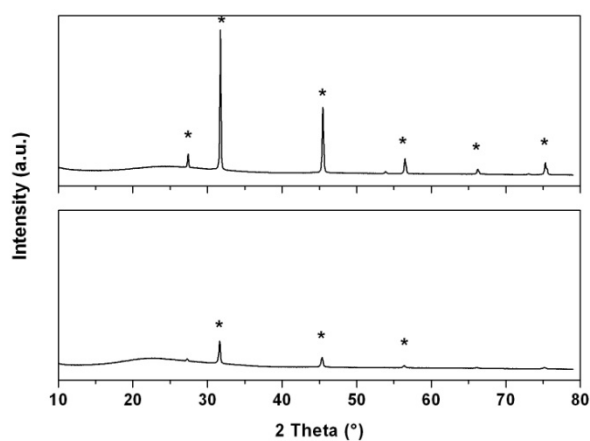

Fig. S11 Powder diffraction pattern from silica-titania aerogel HS\_46 as-prepared (upper figure), respectively heat-treated (lower figure). Peaks corresponding to NaCl (pdf card 01-077-2064) are marked with an asterisk.

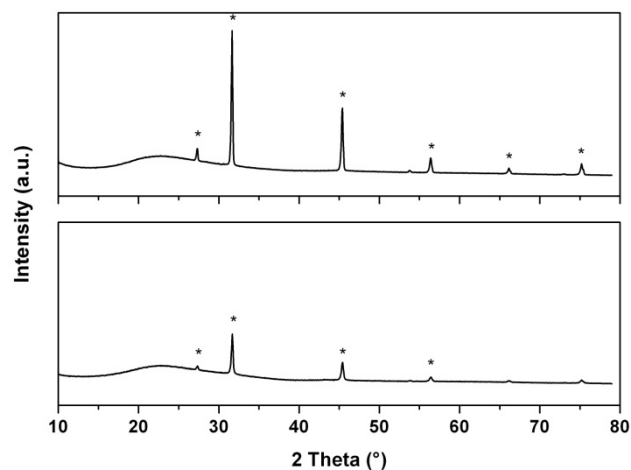

Fig S12: Powder diffraction pattern from silica-titania aerogel HS\_91 as-prepared (upper figure), respectively heat-treated (lower figure). Peaks corresponding to NaCl (pdf card 01-077-2064) are marked with an asterisk.

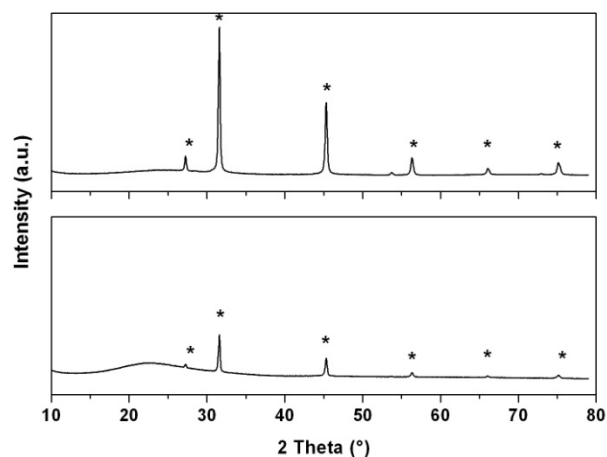

Fig. S13: Powder diffraction pattern from silica-titania aerogel HS\_43.1 as prepared (upper figure), respectively heat-treated (lower figure). Peaks corresponding to NaCl (pdf card 01-077-2064) are marked with an asterisk.

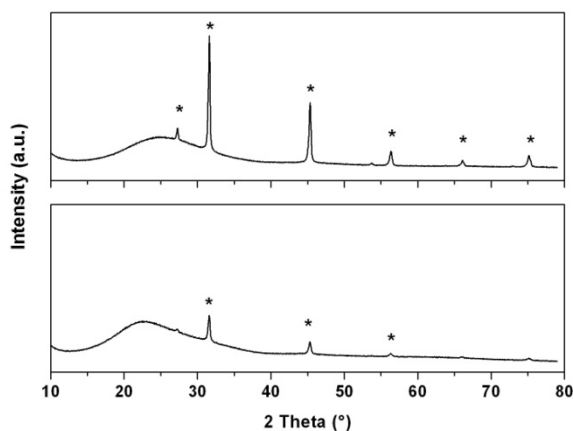

Fig. S14: Powder diffraction pattern from silica-titania aerogel HS\_123 as prepared (upper figure), respectively heat-treated (lower figure). Peaks corresponding to NaCl (pdf card 01-077-2064) are marked with an asterisk.

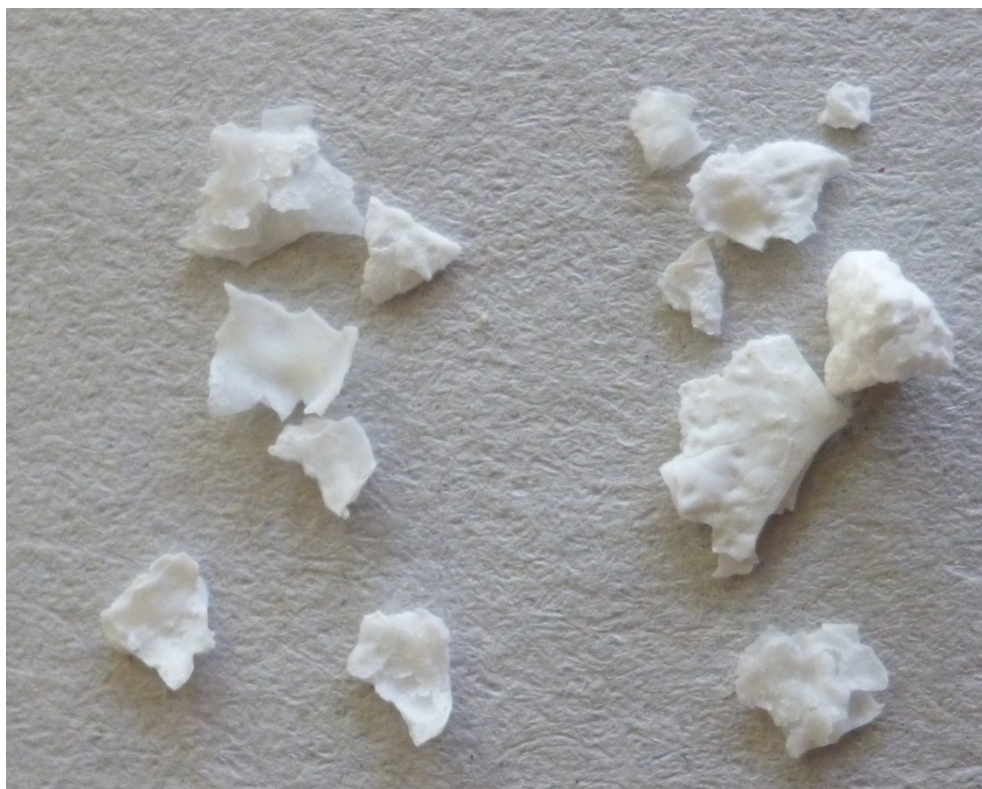

Fig. S15. Photo of silica aerogel HS\_16.2 after supercritical drying

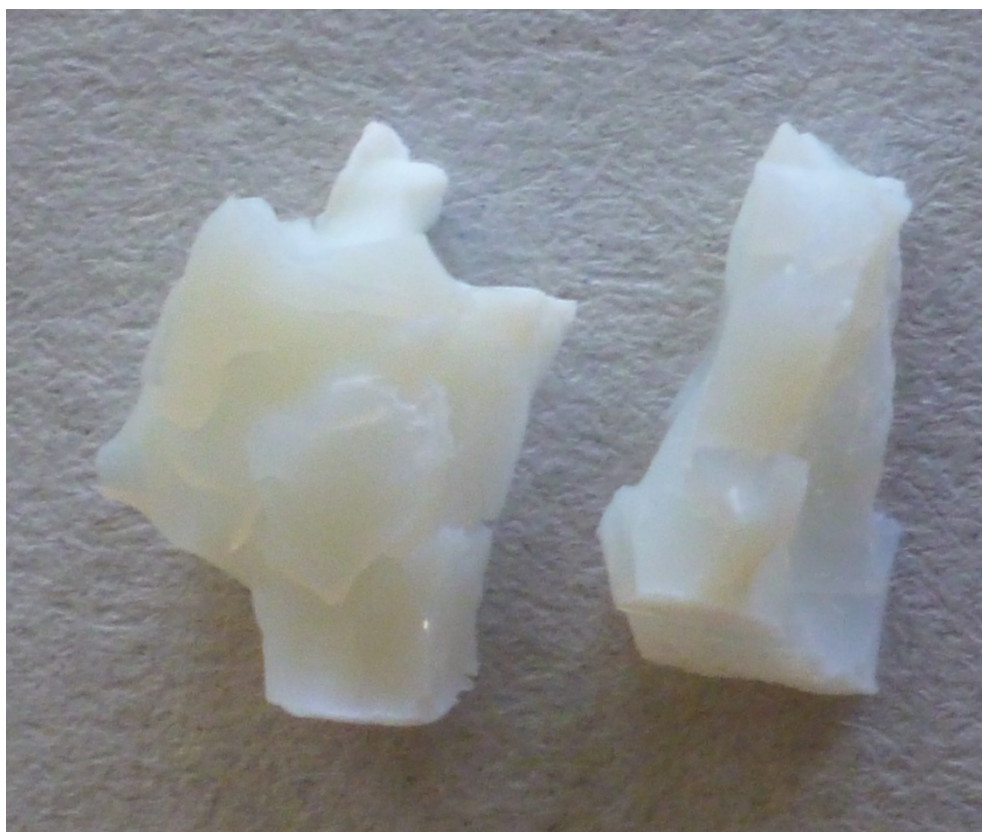

Fig. S16. Photo of silica aerogel HS\_8 after supercritical drying

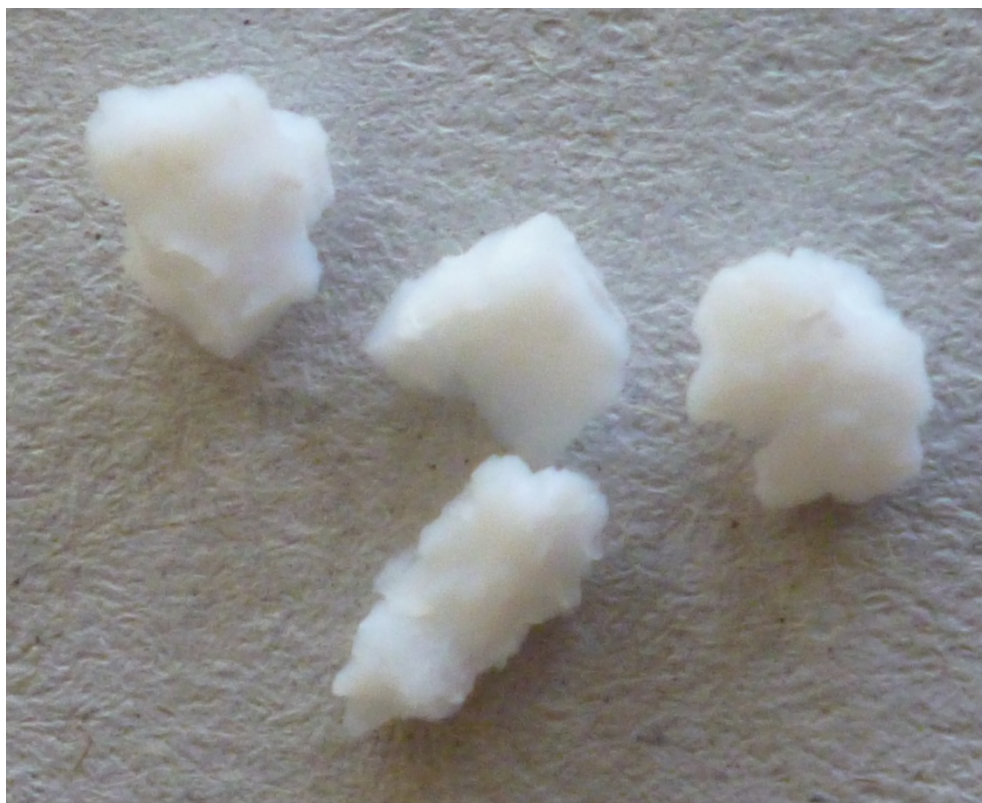

Fig. S17. Photo of silica aerogel HS\_97 after supercritical drying

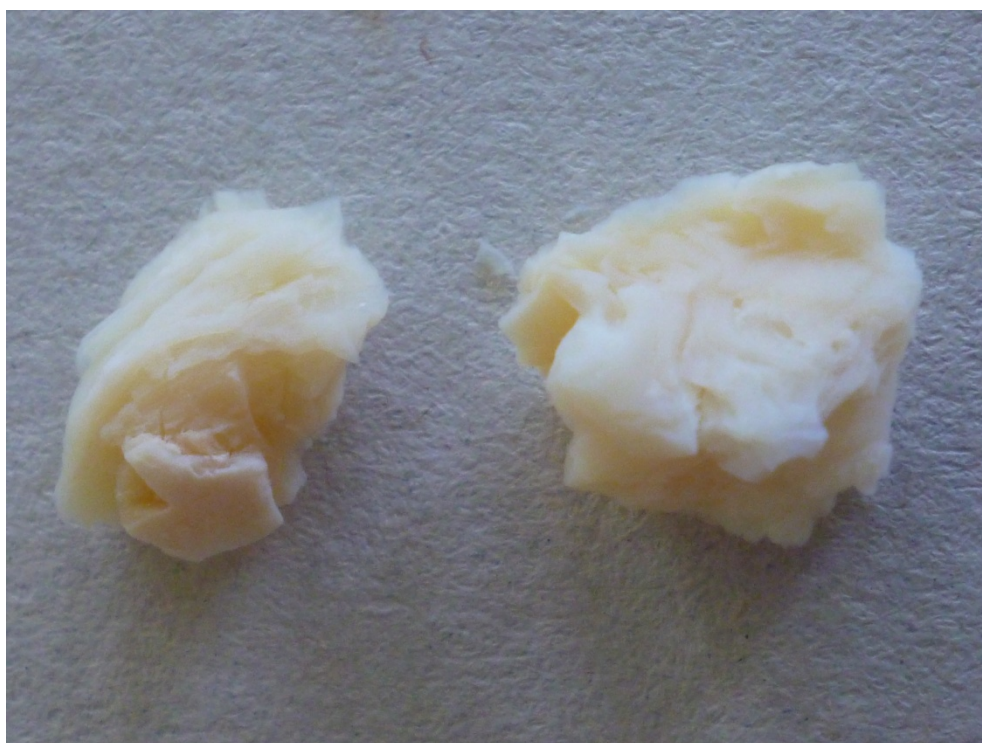

Fig. S18. Photo of silica aerogel HS\_128 after supercritical drying

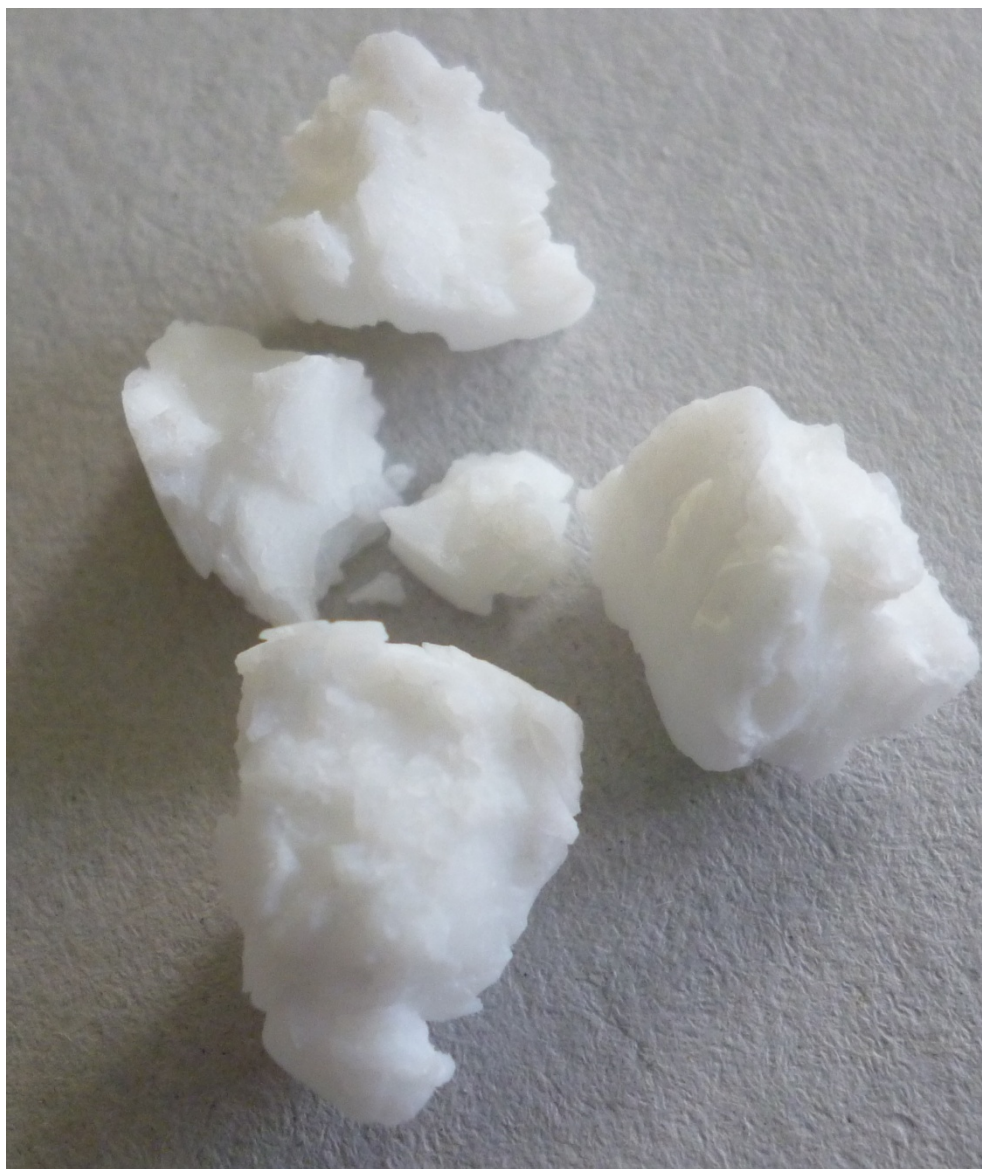

Fig. S19. Photo of silica aerogel HS\_138 after supercritical drying



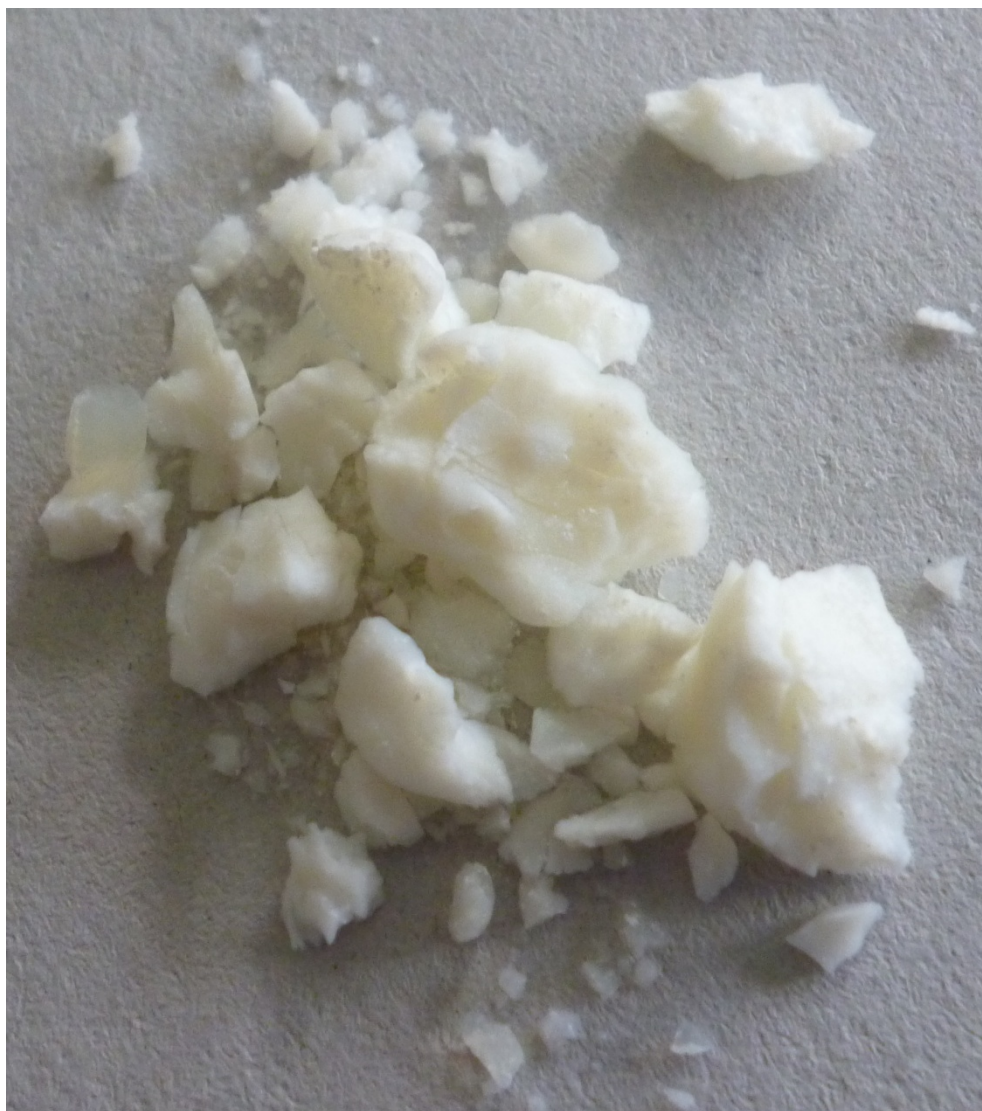

Fig. S20. Photo of titania aerogel HS\_141 after supercritical drying

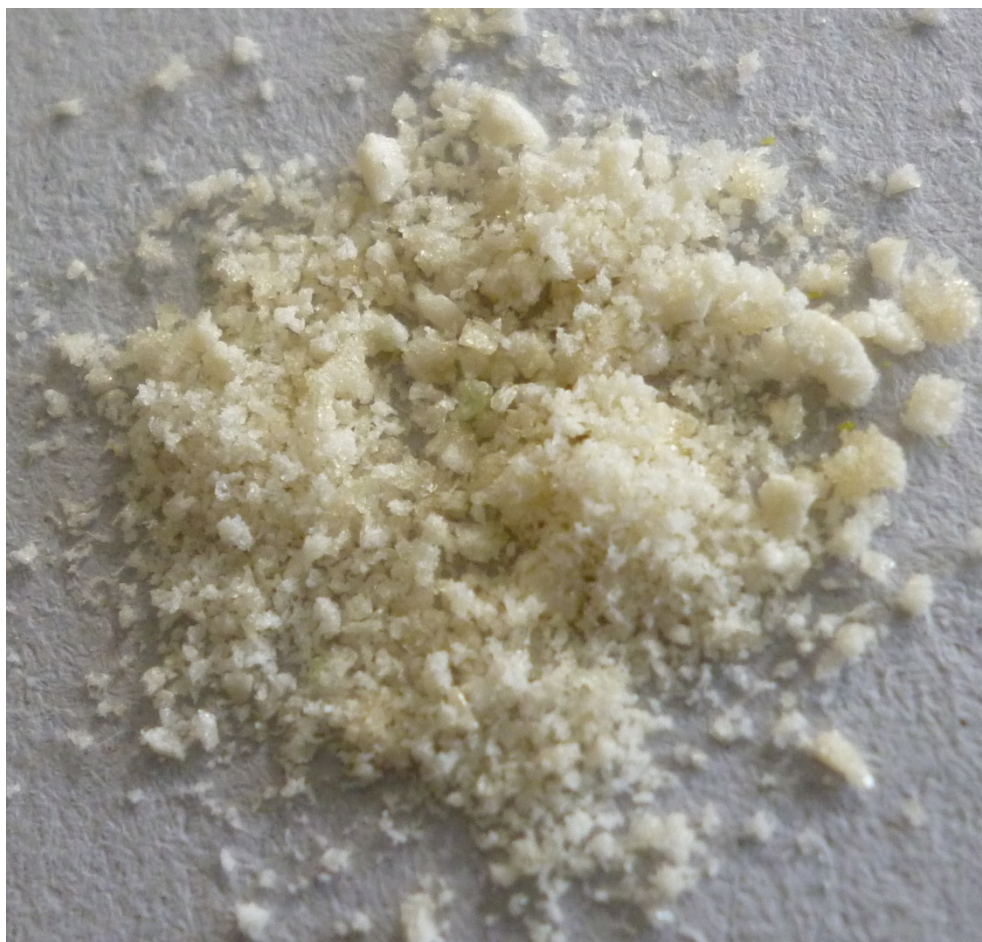

Fig. S21. Photo of titania aerogel HS\_145 after supercritical drying

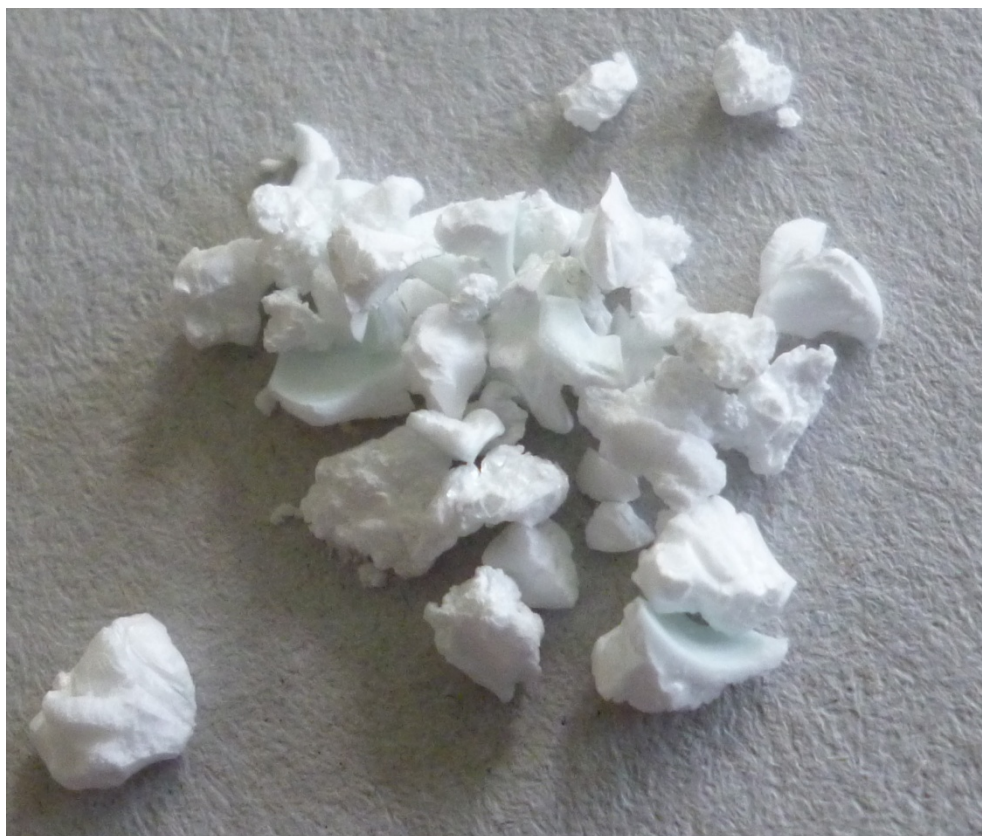

Fig. S22. Photo of zirconia aerogel HS\_3.1 after supercritical drying

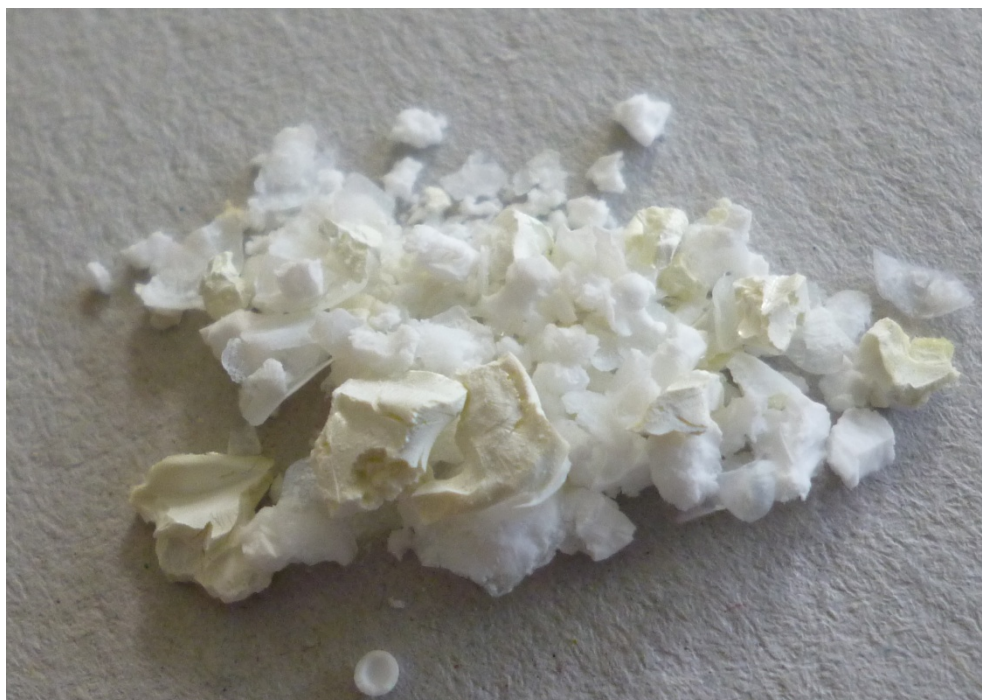

Fig. S23. Photo of zirconia aerogel HS\_3.2 after supercritical drying

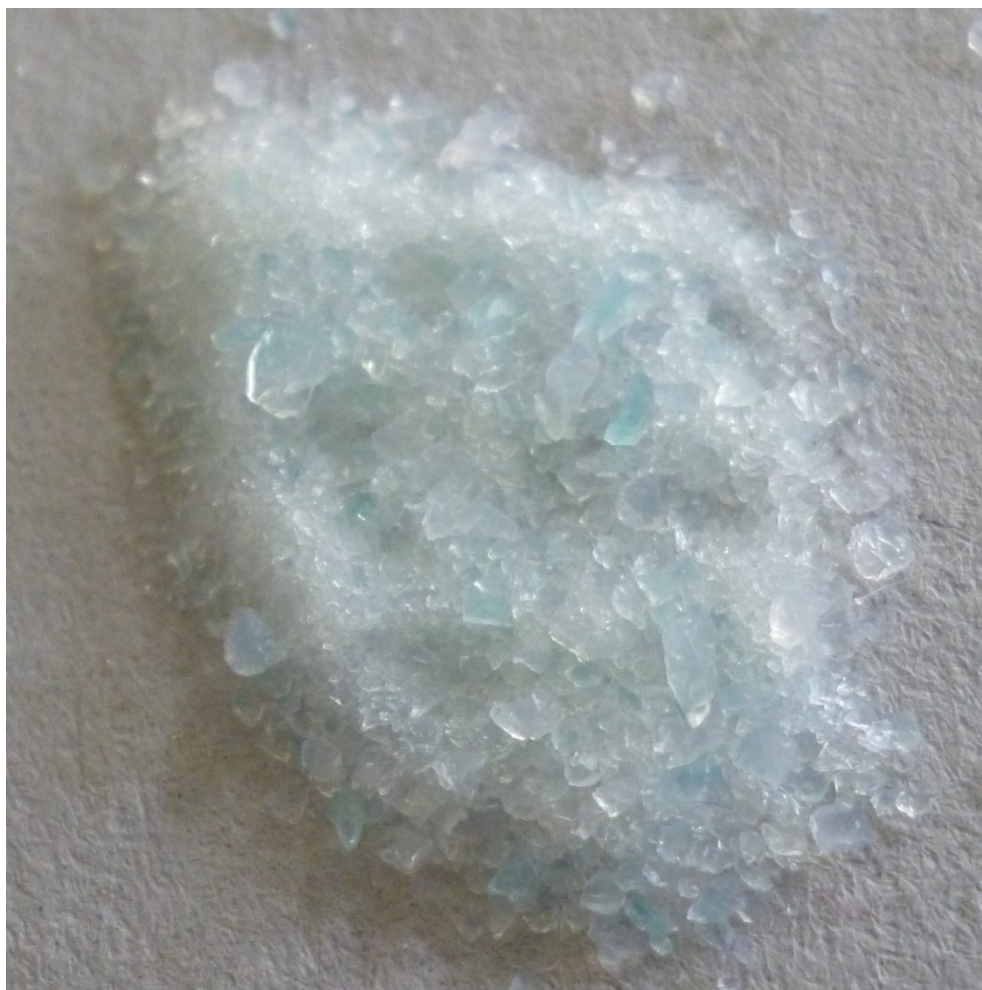

Fig. S24. Photo of zirconia aerogel HS\_33 after supercritical drying

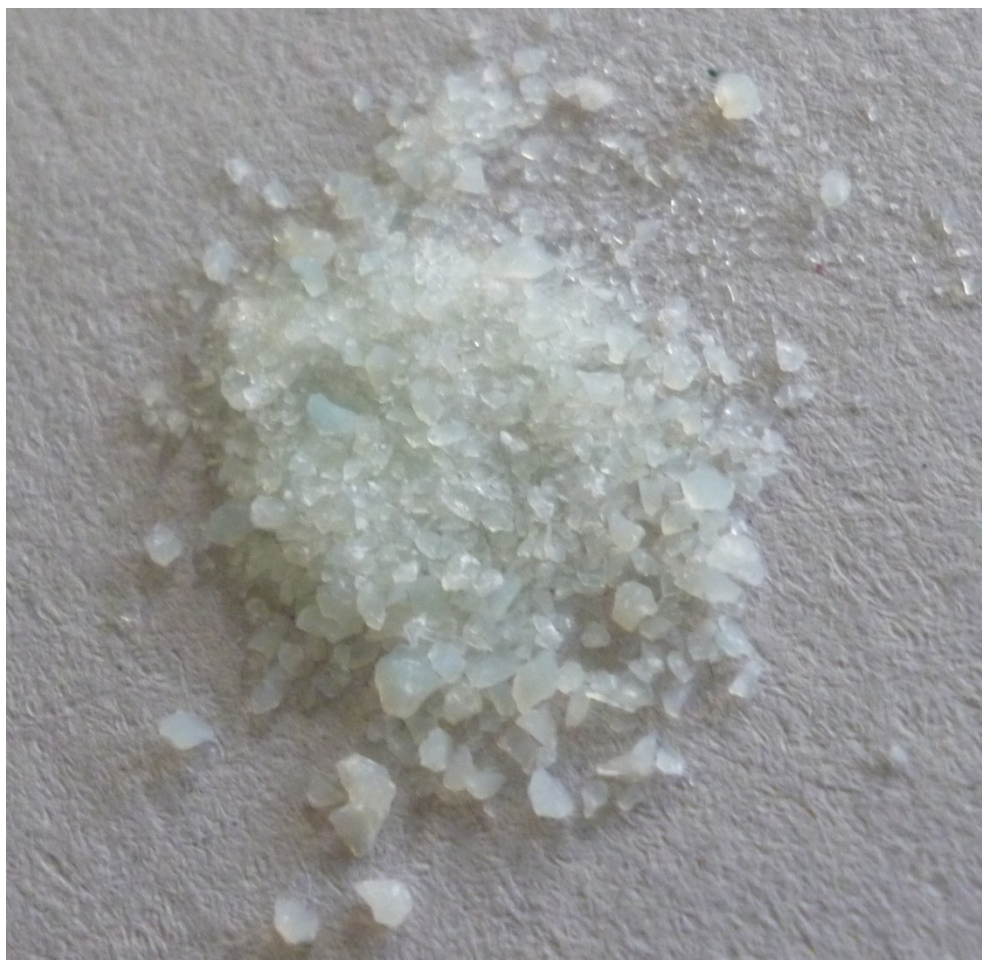

Fig. S25. Photo of zirconia/titania aerogel HS\_32 after supercritical drying

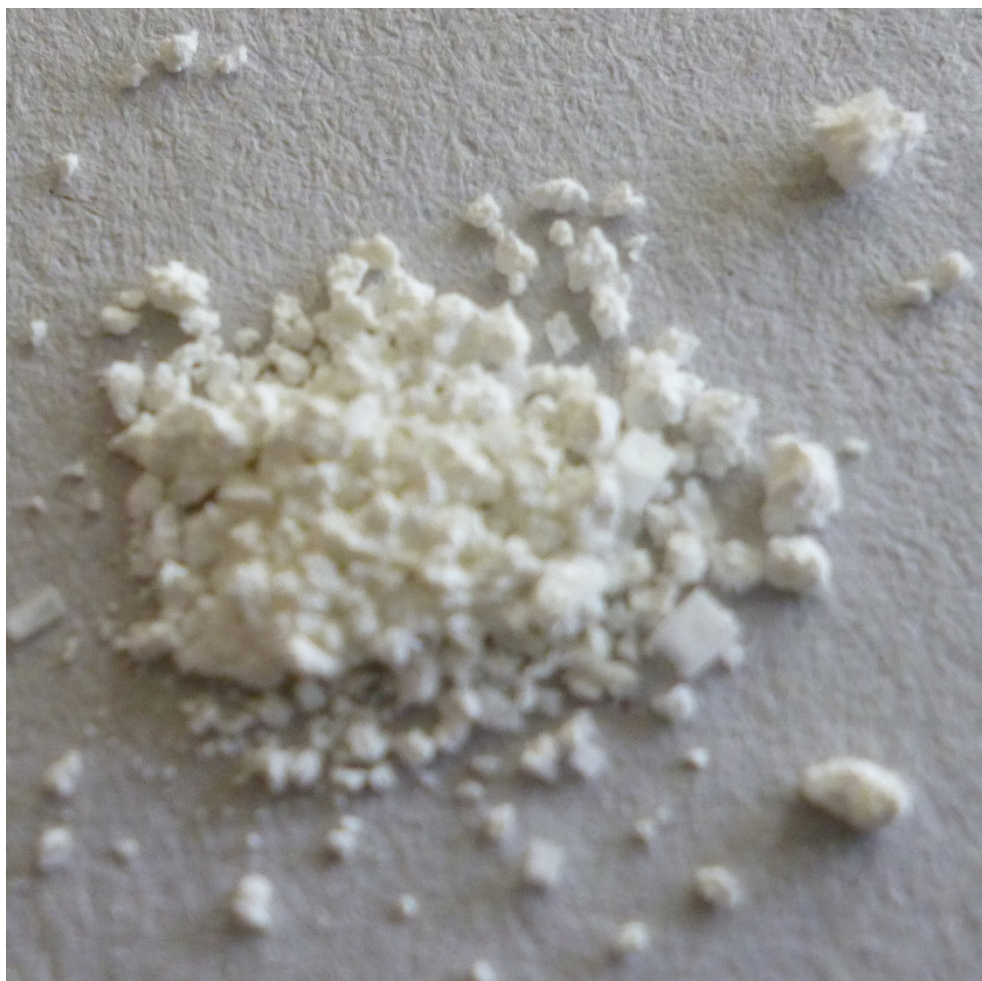

Fig. S26. Photo of silica/titania aerogel HS\_46 after supercritical drying

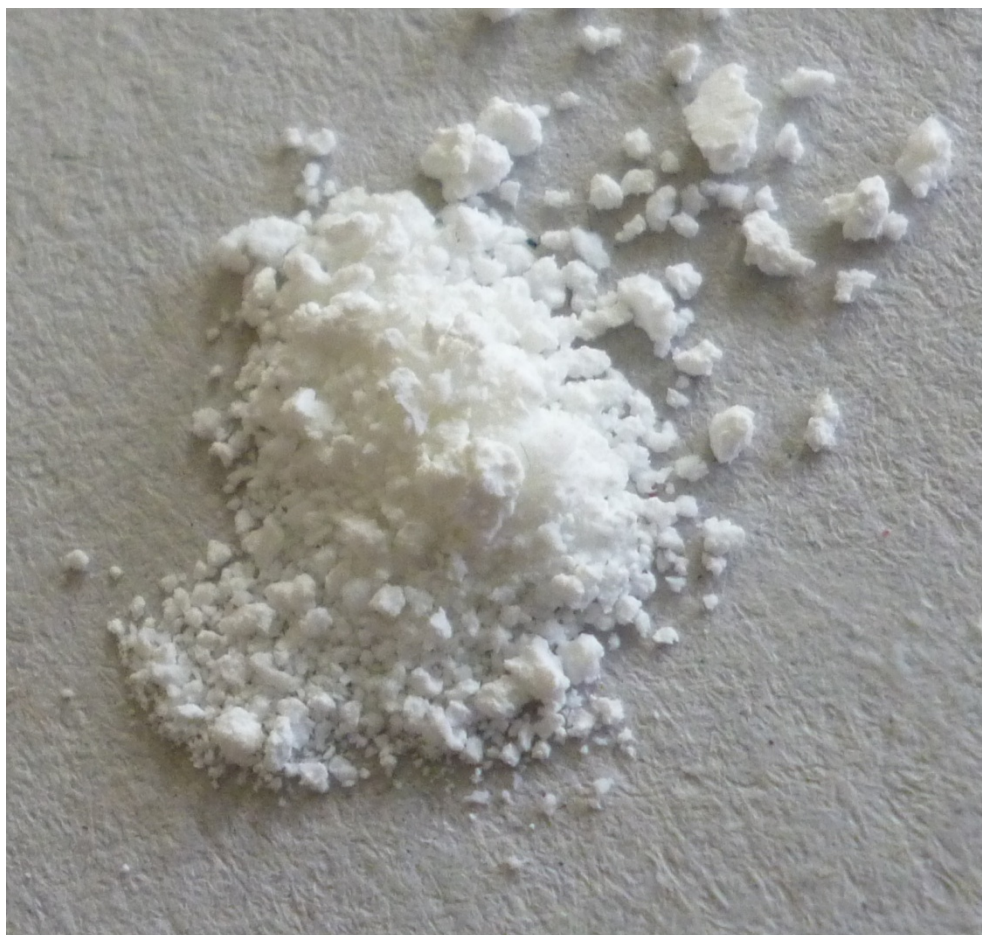

Fig. S27. Photo of silica/titania aerogel HS\_115 after supercritical drying

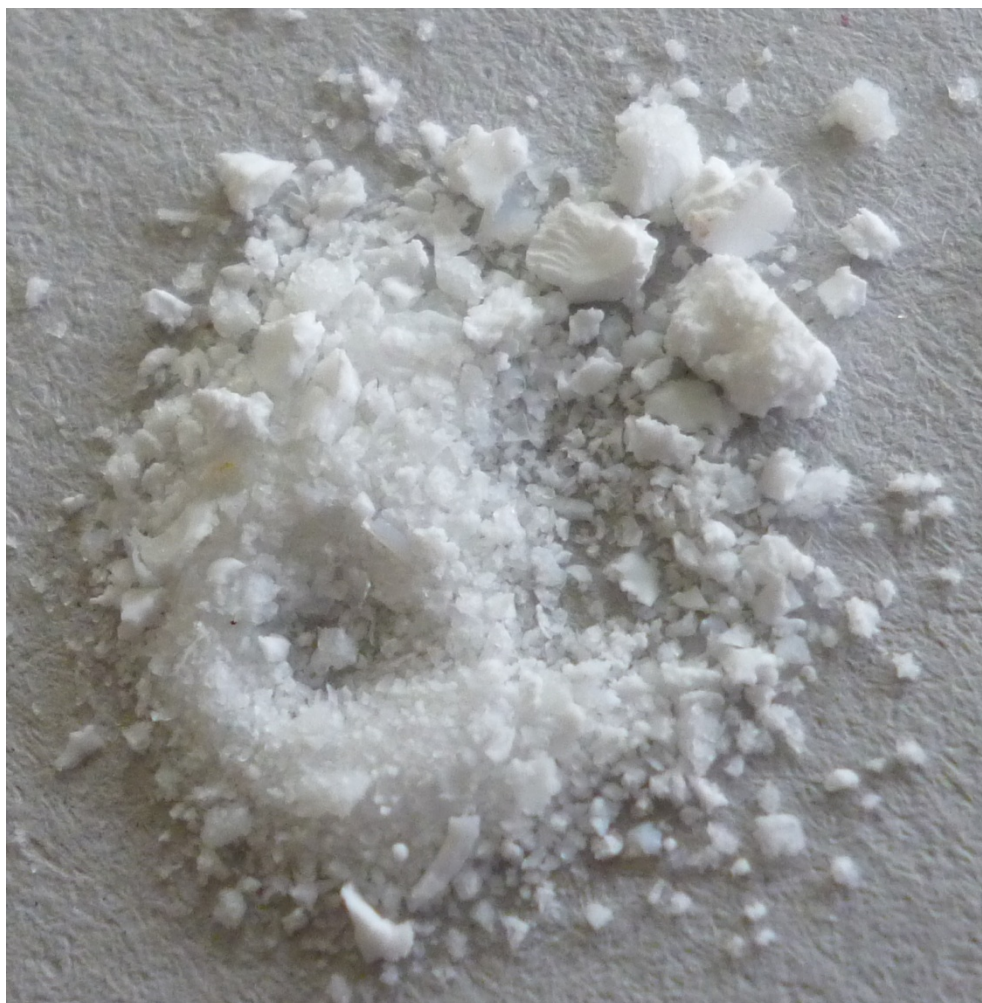

Fig. S28. Photo of silica/titania aerogel HS\_126 after supercritical drying



| sample number | silicon(IV) chloride                                                          | auxiliary agent | solvent                   | Gelation time |
|---------------|-------------------------------------------------------------------------------|-----------------|---------------------------|---------------|
| (HS_16.2)     | 0.9 ml<br>(7.8 mmol)                                                          | -               | water, 10 ml              | < 30 s        |
| (HS_36)       | 1.0 ml<br>(8.73 mmol)                                                         | -               | water, 10 ml              | < 30 s        |
| (HS_8)        | 5 ml<br>(43.6 mmol)                                                           | -               | 58 ml THF +<br>2 ml water | 2 days        |
| HS_97         | 3 ml Sod.Sil.<br>(18.4 mmol) +<br>0.3 ml SiCl <sub>4</sub><br>(2.7 mmol)      | -               | water, 13 ml              | 30 s          |
| HS_128        | 4 ml Sod.Sil.<br>(24.6 mmol) +<br>0.4 ml SiCl <sub>4</sub><br>(3.5 mmol)      | -               | water, 17 ml              | 10 s          |
| HS_129        | 2.5 ml<br>Sod.Sil. (15.3<br>mmol) +<br>0.2 ml SiCl <sub>4</sub><br>(1.7 mmol) | -               | water, 13 ml              | 30 s          |

Table TS1. Preparation conditions of wet silica- gels based on silicon (IV) chloride.

| Sample number | titanium(IV) chloride | Auxiliary agent            | solvent                             | gelation time |
|---------------|-----------------------|----------------------------|-------------------------------------|---------------|
| HS_138        | 0.55 ml<br>(5 mmol)   | PPO, 6 ml<br>(85.7 mmol)   | water, 10 ml                        | < 30 s        |
| HS_10.2       | 0.55 ml<br>(5 mmol)   | PPO, 4.5 ml<br>(64.3 mmol) | water, 10 ml                        | < 30 s        |
| HS_141        | 0.55 ml<br>(5 mmol)   | PPO, 3 ml<br>(42.8 mmol)   | water, 7 ml +<br>ethanol,<br>3 mL   | < 30 s        |
| HS_145        | 0.65 ml<br>(5.9 mmol) | PPO, 3 ml<br>(42.8 mmol)   | water, 8 ml +<br>ethanol,<br>2.5 ml | 20 min        |

Table TS2. Preparation of wet titanium gels based on titanium(IV) chloride.

| Sample number | Zirconium-IV-chloride | Auxiliary agent        | solvent      | gelation time |
|---------------|-----------------------|------------------------|--------------|---------------|
| (HS_3.1)      | 1.16 g = 5 mmol       | PPO, 8 mL (114.3 mmol) | Water, 10 ml | 30 s          |
| (HS_3.2)      | 1.16 g = 5 mmol       | PPO, 5 mL (71.4 mmol)  | Water, 10 ml | 30 s          |
| (HS_33)       | 1.16 g = 5 mmol       | PPO, 5 mL (71.4 mmol)  | Water, 12 ml | 30 s          |

Table TS3. Preparation conditions of wet zirconia gels based on zirconium(IV) chloride

| Sample number | precursor                                                                                    | Auxiliary agent                    | solvent      | Gelation time |
|---------------|----------------------------------------------------------------------------------------------|------------------------------------|--------------|---------------|
| HS_32         | 1.16 g ZrCl <sub>4</sub> (5 mmol) + 0.55 ml TiCl <sub>4</sub> (5 mmol)                       | PPO, 6 mL (85.7 mmol)              | water, 10 ml | 30 s          |
| HS_46         | 2 ml Sod.Sil. (12.3 mmol) + 0.5 ml TiCl <sub>4</sub> (4.56 mmol)                             | -                                  | water, 17 ml | 30 s          |
| HS_91         | 3 ml Sod.Sil. (18.4 mmol) + 0.4 ml TiCl <sub>4</sub> (3.65 mmol)                             | PPO, 3 ml (42.8 mmol)              | water, 18 ml | 30 s          |
| HS_115        | 3 ml Sod. Sil. (18.4 mmol) + solution of 0.5 ml TiCl <sub>4</sub> (4.56 mmol) in 10 ml water | -                                  | water, 15 ml | 30 s          |
| HS_121        | 3 ml Sod. Sil. (18.4 mmol) + 0.7 ml TiCl <sub>4</sub> (6.38 mmol)                            | 3 ml 30w% NaOH (30 mmol), pH = 2)  | water, 18 ml | 30 s          |
| HS_43.1       | 3 ml Sod. Sil. (18.4 mmol) + 0.2 ml TiCl <sub>4</sub> (1.82 mmol)                            | 0.14 ml 37% HCl (1,7 mmol) pH~3    | water, 13 ml | 30 s          |
| HS_123        | 4.5 ml Sod. Sil. (27.6 mmol) + 0.2 ml TiCl <sub>4</sub> (1.82 mmol)                          | 0.22 ml 37% HCl (2.65 mmol), pH ~4 | water, 18 ml | 30 s          |
| HS_126        | 3 ml Sod. Sil. (18.4 mmol) + 0.4 ml TiCl <sub>4</sub> (3.65 mmol)                            | 0.14 ml 30 w% NaOH(1.4 mmol)       | water, 13 ml | 30 s          |

Table TS4. Preparation of wet mixed metal oxide gels
